# Supplementary material for: H3K36 Methylation and the Chromodomain Protein Eaf3 Are Required for Proper Cotranscriptional Spliceosome Assembly
Source: PubMed Central journal article supplement — Cell Rep. Author manuscript; Available in PMC 2019 Dec 11. (PMC6904931; doi:10.1016/j.celrep.2019.05.100), 2019-06-25
Supplement: NIHMS1532884-supplement-1.pdf [file NIHMS1532884-supplement-1.pdf]

**Cell Reports, Volume 27**

**Supplemental Information**

**H3K36 Methylation and the Chromodomain Protein**

**Eaf3 Are Required for Proper Cotranscriptional**

**Spliceosome Assembly**

**Calvin S. Leung, Stephen M. Douglass, Marco Morselli, Matthew B. Obusan, Marat S. Pavlyukov, Matteo Pellegrini, and Tracy L. Johnson**

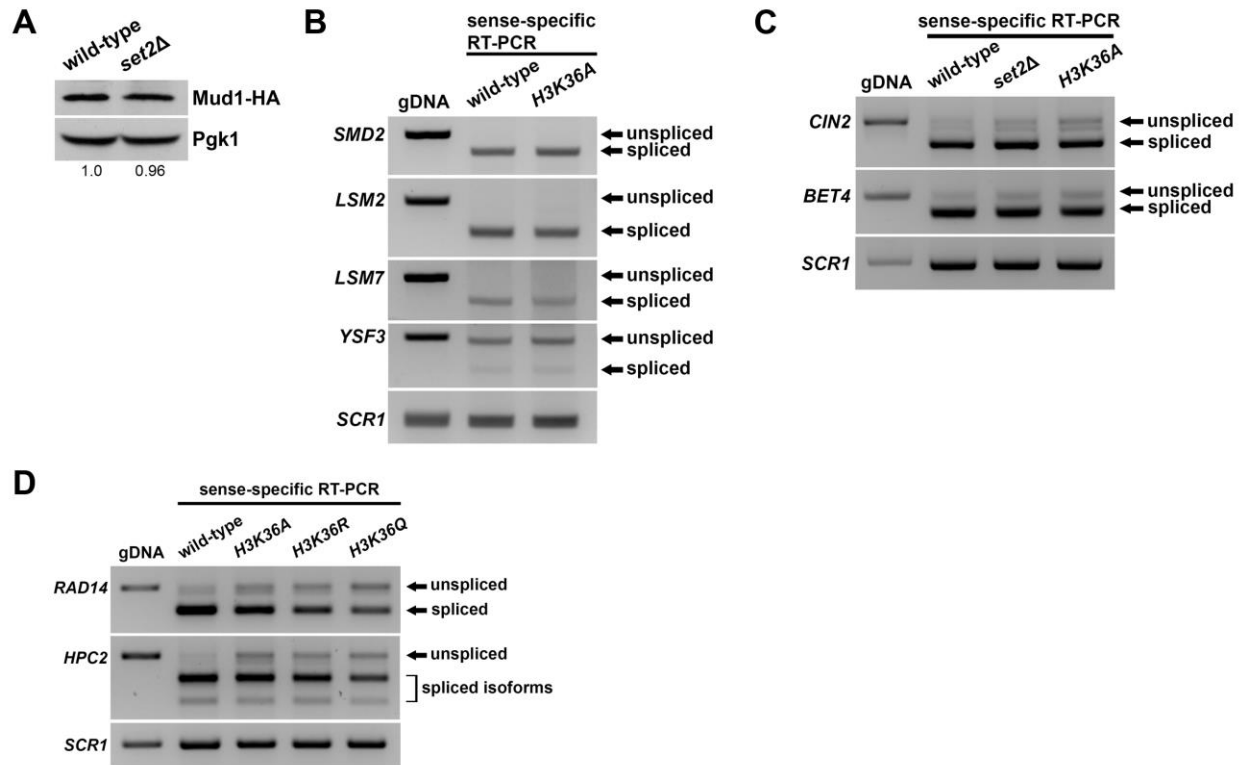

**Figure S1. Splicing defects are observed in the absence of H3K36 methylation. Related to Figure 1. A.** Western blot analysis of Mud1-HA protein levels in wild-type and *set2Δ* cells. Pgk1 is a loading control. Band intensities were quantified using ImageJ. The intensity of Mud1-HA normalized to Pgk1 in *set2Δ* was compared to the intensity of Mud1-HA normalized to Pgk1 in wild-type (defined as 1.0). **B.** RT-PCR of splicing factor ICGs. Products were analyzed on a 1.8% agarose gel. **C.** RT-PCR of ICGs that are lowly expressed and display a splicing defect in both *set2Δ* and *H3K36A* compared to wild-type. Products were analyzed on a 1.8% agarose gel. **D.** Splicing defects are observed in *H3K36R* and *H3K36Q* mutants. Products were analyzed on a 1.8% agarose gel. gDNA: genomic DNA. *SCR1* is a loading control.

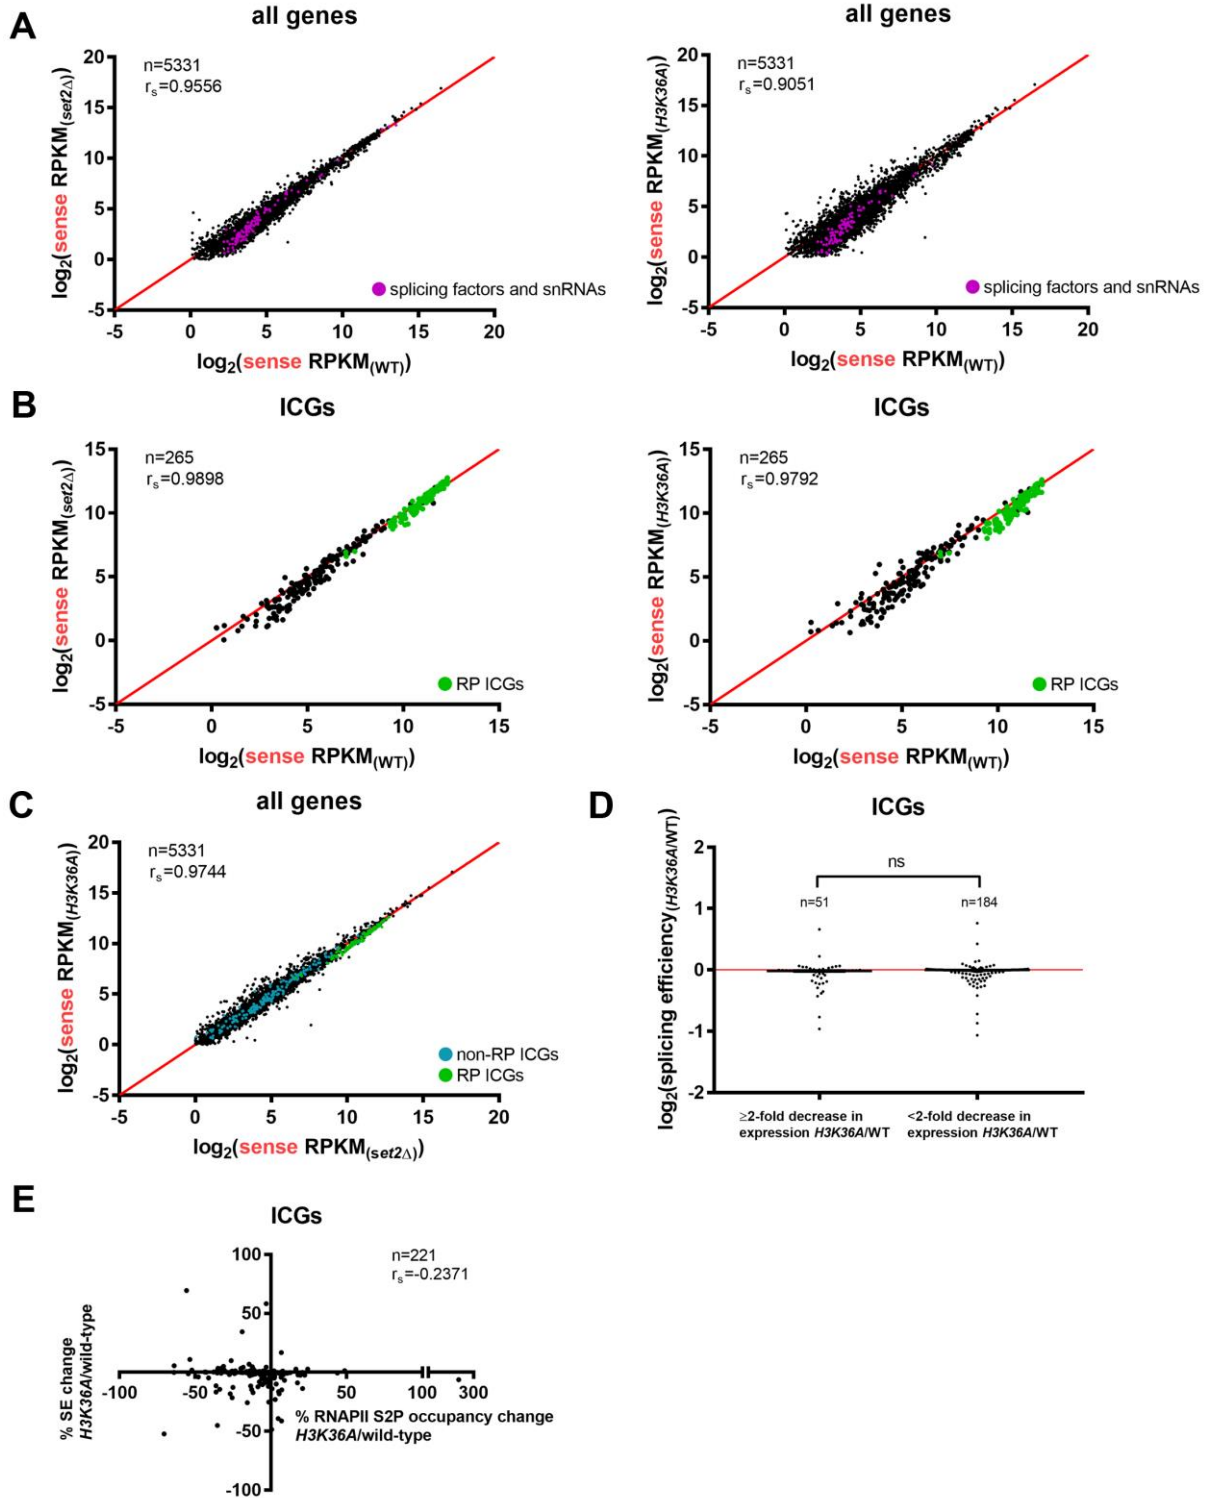

**Figure S2. RNA expression profiles in *set2Δ* and *H3K36A* cells. Related to Figure 1.** **A.** XY-scatter plot of wild-type sense RPKM, *set2Δ* sense RPKM (left), and *H3K36A* sense RPKM (right) of all genes. All splicing factors and spliceosomal snRNAs are labeled in purple. Spearman's correlation coefficient indicated. Red line represents the x=y line. **B.** XY-scatter plot of wild-type sense RPKM, *set2Δ* sense RPKM (left), and *H3K36A* sense RPKM (right) of all ICGs. Ribosomal protein intron-containing genes (RP ICGs) are labeled in green. Spearman's correlation coefficient indicated. **C.** XY-scatter plot of *set2Δ* sense RPKM and *H3K36A* sense RPKM of all ICGs. Non-ribosomal protein intron-containing genes (non-RP ICGs) are labeled in blue and ribosomal protein intron-containing genes (RP ICGs) are labeled in green. Spearman's correlation coefficient indicated. **D.** Scatter plot representing change in splicing efficiency (SE) of ICGs that show a  $\geq 2$ -fold decrease in expression in *H3K36A* compared to wild-type and ICGs that show a  $< 2$ -fold decrease in expression in *H3K36A* compared to wild-type. Solid black line represents the median. Red line represents the y=0 line. Unpaired t test was used to test significance. **E.** XY-scatter plot of % RNAPII S2P ChIP-seq occupancy change and % SE change of all ICGs in *H3K36A*/wild-type cells.

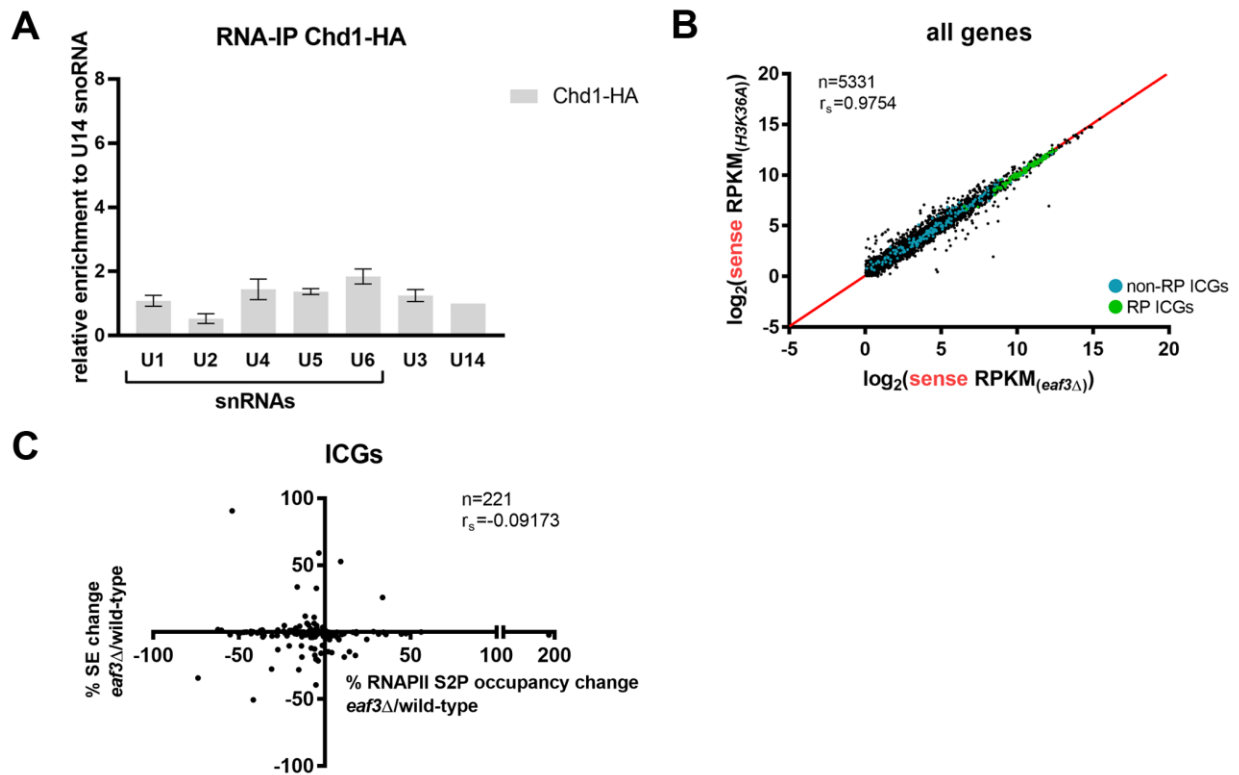

**Figure S3. *eaf3* $\Delta$  and *H3K36A* cells have similar RNA expression profiles. Related to Figure 2.** **A.** Spliceosomal snRNAs co-immunoprecipitated with Chd1-HA. Bar graph depicting the five spliceosomal snRNAs that are pulled-down with Chd1-HA in wild-type cells under non-crosslinking conditions. U3 and U14 are snoRNAs. Bars represent the average of 3 biological replicates. Error bars represent the standard error of the mean (SEM). **B.** XY-scatter plot of *eaf3* $\Delta$  sense RPKM and *H3K36A* sense RPKM of all genes. Non-ribosomal protein intron-containing genes (non-RP ICGs) are labeled in blue and ribosomal protein intron-containing genes (RP ICGs) are labeled in green. Spearman's correlation coefficient indicated. Red line represents the  $x=y$  line. **C.** XY-scatter plot of % RNAPII S2P ChIP-seq occupancy change and % SE change of all ICGs in *eaf3* $\Delta$ /wild-type cells.

**Table S1. Strains used in this study. Related to STAR Methods.**

| <b>Name</b> | <b>Genotype</b>                                                                                                       | <b>Reference</b> |
|-------------|-----------------------------------------------------------------------------------------------------------------------|------------------|
| BY4741      | MATa his3Δ1 leu2Δ0 met15Δ0 ura3Δ0                                                                                     | Open Biosystems  |
| TJY7170     | MATa <i>set2</i> Δ::KANMX4 his3Δ1 leu2Δ0 met15Δ0 ura3Δ0                                                               | GE Dharmacon     |
| TJY7152     | MATa his3Δ200 leu2Δ0 lys2Δ0 trp1Δ63 ura3Δ0 met15Δ0 can1::MFA1pr-HIS3 hht1-hhf1::NatMX4 hht2-hhf2::[H3K36A-HHFS]*-URA3 | GE Dharmacon     |
| TJY7171     | MATa <i>set2</i> <i>SRI</i> Δ::HIS3 his3Δ1 leu2Δ0 met15Δ0 ura3Δ0                                                      | This study       |
| TJY7153     | MATa <i>eaf3</i> Δ::KANMX4 his3Δ1 leu2Δ0 met15Δ0 ura3Δ0                                                               | GE Dharmacon     |
| TJY7158     | MATa EAF3-HA::HIS3MX6 his3Δ1 leu2Δ0 met15Δ0 ura3Δ0                                                                    | This study       |
| TJY7159     | MATa <i>set2</i> Δ::KANMX4 EAF3-HA::HIS3 his3Δ1 leu2Δ0 met15Δ0 ura3Δ0                                                 | This study       |
| TJY7214     | MATa PRP45-HA::KANMX6 his3Δ1 leu2Δ0 met15Δ0 ura3Δ0                                                                    | This study       |
| TJY7209     | MATa PRP45-Myc::HIS3MX6 his3Δ1 leu2Δ0 met15Δ0 ura3Δ0                                                                  | This study       |
| TJY7216     | MATa EAF3-HA::HIS3MX6 PRP45-Myc::HIS3MX6 his3Δ1 leu2Δ0 met15Δ0 ura3Δ0                                                 | This study       |
| TJY7215     | MATa <i>eaf3</i> Δ::KANMX4 PRP45-HA::HIS3MX6 his3Δ1 leu2Δ0 met15Δ0 ura3Δ0                                             | This study       |
| TJY7238     | MATa <i>set2</i> Δ::KANMX4 PRP45-HA::HIS3MX6 his3Δ1 leu2Δ0 met15Δ0 ura3Δ0                                             | This study       |
| TJY7240     | MATa PRP19-HA::HIS3MX6 his3Δ1 leu2Δ0 met15Δ0 ura3Δ0                                                                   | This study       |
| TJY7241     | MATa <i>eaf3</i> Δ::KANMX4 PRP19-HA::HIS3 his3Δ1 leu2Δ0 met15Δ0 ura3Δ0                                                | This study       |
| TJY7242     | MATa his3Δ200 leu2Δ0 lys2Δ0 trp1Δ63 ura3Δ0 met15Δ0 can1::MFA1pr-HIS3 hht1-hhf1::NatMX4 hht2-hhf2::[H3K36R-HHFS]*-URA3 | GE Dharmacon     |
| TJY7243     | MATa his3Δ200 leu2Δ0 lys2Δ0 trp1Δ63 ura3Δ0 met15Δ0 can1::MFA1pr-HIS3 hht1-hhf1::NatMX4 hht2-hhf2::[H3K36Q-HHFS]*-URA3 | GE Dharmacon     |
| TJY7244     | MATa MUD1-HA::KANMX4 his3Δ1 leu2Δ0 met15Δ0 ura3Δ0                                                                     | This study       |
| TJY7245     | MATa <i>set2</i> Δ::KANMX4 MUD1-HA::HIS3MX6 his3Δ1 leu2Δ0 met15Δ0 ura3Δ0                                              | This study       |
| TJY7246     | MATa CHD1-HA::KANMX4 his3Δ1 leu2Δ0 met15Δ0 ura3Δ0                                                                     | This study       |

**Table S3. Primer sequences used for RT-PCR, RT-qPCR, and ChIP-qPCR. Related to STAR Methods.**

| Name          | Sequence (5' to 3')            | Purpose |
|---------------|--------------------------------|---------|
| HPC2 sense    | AACACCACCTCTTTTCATGGTACCA      | RT-PCR  |
| HPC2 F        | CCTCCACGA CCATATTCAA ACGATTGG  | RT-PCR  |
| HPC2 R        | GGAACCAGAAATTATAATGGGAGACGG    | RT-PCR  |
| RAD14 sense   | TGTCAATTTCTTCAGTTTCTAGCCC      | RT-PCR  |
| RAD14 F       | CGTAGTGAAGGTATCGAACGTAACGC     | RT-PCR  |
| RAD14 R       | GTGTTAGTGTTAGCAAGCGCAGACG      | RT-PCR  |
| DYN2 sense    | CGCCAGTGGACCGATATAGAAATAA      | RT-PCR  |
| DYN2 F        | GGAAAGCCTCCAAAACACTACTGCCAG    | RT-PCR  |
| DYN2 R        | GAAAACATAAAAACGCCAGTGGACCG     | RT-PCR  |
| MUD1 sense    | GGTAACGTCATTGTTTTGTAGCTTGT     | RT-PCR  |
| MUD1 F        | CGGCCTCATCAAACCTAAAGAAACC      | RT-PCR  |
| MUD1 R        | GAAACCGGTCTGCTTCTTCTTGAG       | RT-PCR  |
| YCL002C sense | TTATAGTTTTCTTTTGGCAACCGTG      | RT-PCR  |
| YCL002C F     | ATGCTTGTTA TTGTTCTGCAGGGC      | RT-PCR  |
| YCL002C R     | AACTGCCTTAAAACCATCATGCAGC      | RT-PCR  |
| TFC3 sense    | ACCAATTATGATTGACCCAATAGCC      | RT-PCR  |
| TFC3 F        | GACGATTTATCCTGACGAACTCGTAC     | RT-PCR  |
| TFC3 R        | CCTGATTTGGCAACTTCGAGAAGTA      | RT-PCR  |
| RPL14A sense  | TTAAGCCTTAGCCAAAGCCTTCTTG      | RT-PCR  |
| RPL14A F      | CAAGGCTTCTAACTGGAGATTAGTCG     | RT-PCR  |
| RPL14A R      | CAATCTTCTTAGCCCAAGATGAAGC      | RT-PCR  |
| SCR1 sense/R  | CACAATGTGCGAGTAAATCCTGATG      | RT-PCR  |
| SCR1 F        | AAGGGATAGTTCTCTATTCCGCACC      | RT-PCR  |
| CIN2 sense    | CTATAAGTAAGCGGAAACAACACTGC     | RT-PCR  |
| CIN2 F        | GCTTAAGCATAAATGGACTTTACTGCG    | RT-PCR  |
| CIN2 R        | GCTGAATCACCCCTTCTCCAAGAC       | RT-PCR  |
| BET4 sense    | CACTTATGCTGCTCCAGGAGATG        | RT-PCR  |
| BET4 F        | ACTATAAAGCAGTAGGTCAGCAATG      | RT-PCR  |
| BET4 R        | TCCAATAGACTTTGGGGTAATCCTTC     | RT-PCR  |
| YSF3 sense/R  | CTACCTCTCTTCTCGTAAGTAGGCTT     | RT-PCR  |
| YSF3 F        | GGTTATATTACACAATTCGAAACAGTGAAA | RT-PCR  |
| LSM2 sense/R  | TCTTTCAGTCATTACCTCCCTTCTGG     | RT-PCR  |
| LSM2 F        | CAAGACTTTA GTTGACCAAG AAGTGGT  | RT-PCR  |
| SMD2 sense/R  | ACTCAACAGGGGTTTTTAACACAACG     | RT-PCR  |
| SMD2 F        | CGCCTTTGACAGTTGATTAGAGGAGT     | RT-PCR  |
| LSM7 sense/R  | TATAGTACATCAGAACCTTCGGCGG      | RT-PCR  |
| LSM7 F        | CAAAAAACATGCATCAGCAACACTCC     | RT-PCR  |
| U1 F          | ATTGAAGTCATTGATGCAAACCTCCT     | qPCR    |
| U1 R          | GGTGTCAAACCTTCTCCAGGCAG        | qPCR    |

|           |                              |           |
|-----------|------------------------------|-----------|
| U2 F      | TATCGATGGGAAGAAATGGTGC       | qPCR      |
| U2 R      | CTCTTGACAGGCCACCAG           | qPCR      |
| U4 F      | CGCATATCAGTGAGGATTCGTC       | qPCR      |
| U4 R      | CCAAAAATTCCTACATAGTCTTGAAGTA | qPCR      |
| U5 F      | TACAGATCAATGGCGGAGGG         | qPCR      |
| U5 R      | AAATATGGCAAGCCCACAGTAAC      | qPCR      |
| U6 F      | AAGTAACCCTTCGTGGACATTTG      | qPCR      |
| U6 R      | TCTCTTTGTAAAACGGTTCATCCTTAT  | qPCR      |
| U3 F      | CAAAGAGCCACTGAATCCAAC        | qPCR      |
| U3 R      | TAGATGGCCGAACCGCTAAG         | qPCR      |
| U14 F     | GGTGATGAAAGACTGGTTCCTTA      | qPCR      |
| U14 R     | AAGGTCTCTAAAGAAGAGCGGTC      | qPCR      |
| HPC2 1 F  | ACCTCCACGACCATATTCAAACG      | ChIP-qPCR |
| HPC2 1 R  | CCCTAACGAAGGGCGGATAATTG      | ChIP-qPCR |
| HPC2 2 F  | TTCCTCCAGTACAAACCCGATGG      | ChIP-qPCR |
| HPC2 2 R  | ATCACGGGGGATGGTGAATG         | ChIP-qPCR |
| HPC2 3 F  | CTCCAGCAAAAAGCCTACGTCTG      | ChIP-qPCR |
| HPC2 3 R  | TCTTGGTCGTTGTTGGCTTTGG       | ChIP-qPCR |
| HPC2 4 F  | TCTCCGAAGAAGAAGTCGCATCC      | ChIP-qPCR |
| HPC2 4 R  | CCGAATCATCAATGAACGGATCTTC    | ChIP-qPCR |
| RAD14 1 F | GTATCGAACGTAACGCTATGACTCC    | ChIP-qPCR |
| RAD14 1 R | ACCCACGGTTAAAATACAAACACAG    | ChIP-qPCR |
| RAD14 2 F | GGCAGCAATCGGGATGATAATG       | ChIP-qPCR |
| RAD14 2 R | TGTTAGTGTTAGCAAGCGCAGACG     | ChIP-qPCR |
| RAD14 3 F | TGCACCTCCTCCAGAGCATATTTTC    | ChIP-qPCR |
| RAD14 3 R | CATCATGTAGCACAGGATCCATCTC    | ChIP-qPCR |
| RAD14 4 F | AATGGCAACGTCGTGAAGAAGG       | ChIP-qPCR |
| RAD14 4 R | GCTCTTGTTTTTCAGTCGCATTTC     | ChIP-qPCR |
| ECM33 1 F | AAGAGGAAACGGGTTTCGAG         | ChIP-qPCR |
| ECM33 1 R | ACTCGCCCTAATCCTATGACAG       | ChIP-qPCR |
| ECM33 2 F | ACCAGTGCTTCTTTCGGTTC         | ChIP-qPCR |
| ECM33 2 R | GGTAGAAATGGCAGGCAAAG         | ChIP-qPCR |
| ECM33 3 F | AGGCCGCTTTCAGTAACTTG         | ChIP-qPCR |
| ECM33 3 R | ACTTCAATGGCACCACCAAC         | ChIP-qPCR |
| ECM33 4 F | TAGTGGTGATGCCTCCAATG         | ChIP-qPCR |
| ECM33 4 R | TGGAACAAGTTCTGGAGCAG         | ChIP-qPCR |
| ADH1 1 F  | TGGTGTCTGTCACACTGACTTG       | ChIP-qPCR |
| ADH1 1 R  | TTCGTGACCACCGACTAATG         | ChIP-qPCR |
| ADH1 2 F  | TCACGCTGACTTGTCTGGTTAC       | ChIP-qPCR |
| ADH1 2 R  | AATGTGAGCGGCTTGAACAG         | ChIP-qPCR |
| ADH1 3 F  | TTGACGGTGGTGAAGGTAAG         | ChIP-qPCR |
| ADH1 3 R  | CACCGACAATGTCCTTTTCC         | ChIP-qPCR |
| ADH1 4 F  | TCAACCAAGTCGTCAAGTCC         | ChIP-qPCR |
| ADH1 4 R  | TCTGGCGAAGAAGTCCAAAG         | ChIP-qPCR |
